# Supplementary material for: Comparing lung ultrasound: extensive versus short in COVID-19 (CLUES): a multicentre, observational study at the emergency department
Source: HighWire-hosted journal article supplement (doi:10.1136/bmjopen-2021-048795), 2021-09-01
Supplement: bmjopen-2021-048795supp001_data_supplement.pdf [file bmjopen-2021-048795supp001_data_supplement.pdf]

**Appendices of Comparing Lung Ultrasound: Extensive vs Short in COVID-19 (CLUES).****Supplementary table 1: Sonographic features of COVID-19 pneumonia compared to CT findings, after Peng et al. [18]**

| <b>Lung ultrasound</b>                                                                                                                                                                                                                                                                                                                      | <b>Chest CT</b>                                                                                                                                                                                                                           |
|---------------------------------------------------------------------------------------------------------------------------------------------------------------------------------------------------------------------------------------------------------------------------------------------------------------------------------------------|-------------------------------------------------------------------------------------------------------------------------------------------------------------------------------------------------------------------------------------------|
| Thickened & irregular pleural line                                                                                                                                                                                                                                                                                                          | Thickened pleura                                                                                                                                                                                                                          |
| B-lines (discrete, multifocal or confluent)                                                                                                                                                                                                                                                                                                 | Ground glass opacities (GGOs)                                                                                                                                                                                                             |
| Confluent B-lines                                                                                                                                                                                                                                                                                                                           | Pulmonary infiltrating shadow                                                                                                                                                                                                             |
| Sub-pleural consolidations or 'skip' lesions                                                                                                                                                                                                                                                                                                | Sub-pleural consolidation                                                                                                                                                                                                                 |
| Both non-translobar and translobar consolidation                                                                                                                                                                                                                                                                                            | Translobar consolidation                                                                                                                                                                                                                  |
| Rare pleural effusion                                                                                                                                                                                                                                                                                                                       | Rare pleural effusion                                                                                                                                                                                                                     |
| Multi-zone, patchy distribution of abnormalities                                                                                                                                                                                                                                                                                            | Multiple lobes affected                                                                                                                                                                                                                   |
| <p>Early stage and mild infection: focal B-lines are the main feature.</p> <p>Progressive stage and severe infection: alveolar interstitial syndrome is the main feature.</p> <p>Convalescence: returning of A-lines are the main feature.</p> <p>Pulmonary fibrosis: pleural line thickening with uneven B lines are the main feature.</p> | <p>Very early stage: negative or atypical findings in lung CT images.</p> <p>Pneumonia: diffuse scattered or ground glass opacities are seen.</p> <p>With progression of the disease further lung consolidation are the main feature.</p> |

**Supplementary table 2: McNemar test results.**

| McNemar test | 12-zone vs 8-points | 12-zone vs 6-points | 8-points vs 6-points |
|--------------|---------------------|---------------------|----------------------|
|              |                     |                     |                      |

|                  |       |       |       |
|------------------|-------|-------|-------|
| SARS-CoV-2 PCR + | 0.000 | 0.250 | 0.022 |
| SARS-CoV-2 PCR - | 0.238 | 0.000 | 0.004 |

|                   |                     |                     |                      |
|-------------------|---------------------|---------------------|----------------------|
| McNemar test      | 12-zone vs 8 points | 12-zone vs 6-points | 8-points vs 6-points |
| Final diagnosis + | 0.003               | 0.625               | 0.022                |
| Final diagnosis - | 0.332               | 0.000               | 0.004                |

**Supplementary table 3: descriptive statistics of clinical symptoms.**

| Symptoms    | SARS-CoV-2 PCR + | SARS-CoV-2 PCR - | P value |
|-------------|------------------|------------------|---------|
| Fever       | 63 (70.0)        | 47 (41.6)        | 0.001   |
| Coughing    | 71 (78.9)        | 64 (56.6)        | 0.000   |
| Wheezing    | 2 (2.1)          | 0 (0.0)          | 0.001   |
| Dyspnea     | 60 (66.7)        | 52 (46.0)        | 0.001   |
| Fatigue     | 33 (34.4)        | 24 (21.2)        | 0.000   |
| Headache    | 15 (16.7)        | 14 (12.4)        | 0.086   |
| Diarrhea    | 17 (18.9)        | 7(6.2)           | 0.000   |
| Muscle pain | 21 (23.3)        | 10 (8.8)         | 0.000   |

**Study population flowchart.**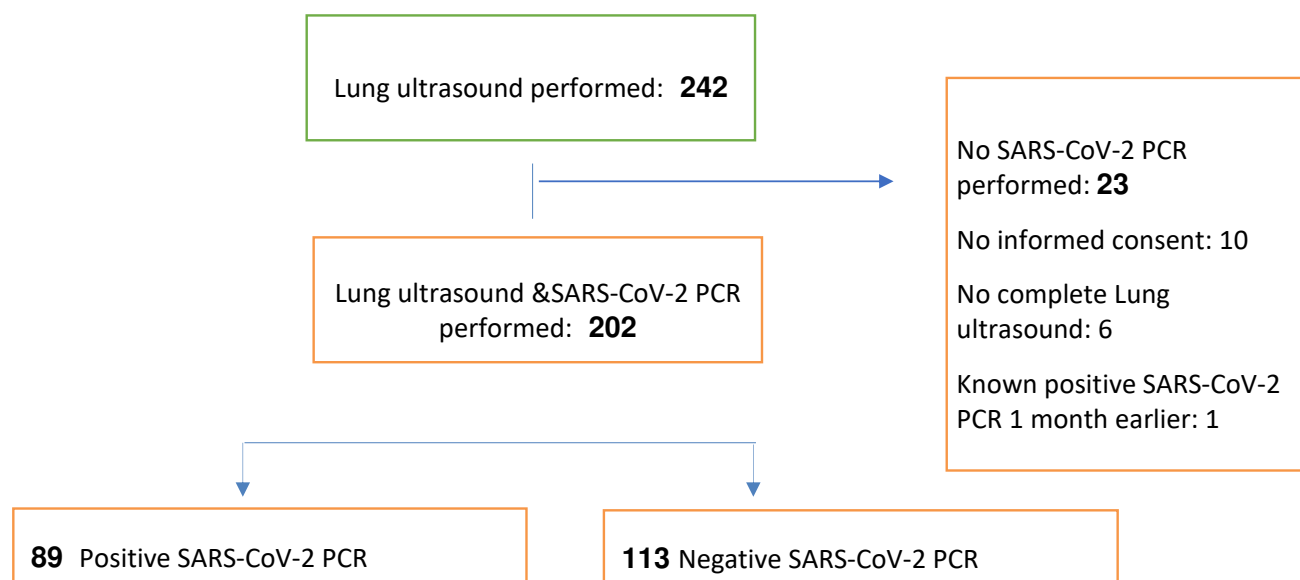**Entrustable Professional Activity (EPA).**

EPA is a key task of a discipline (e.g. acute internal medicine) that an individual can be trusted to perform in a given health care context, once sufficient competence has been demonstrated. (after ten Cate O. Entrustability of professional activities and competency-based training. *Med Educ.* 2005;39(12):1176-1177. doi:10.1111/j.1365-2929.2005.02341.x)

| EPA Level |                                                       |
|-----------|-------------------------------------------------------|
| 1         | Observation, no task performance.                     |
| 2         | Task performance whilst receiving active supervision. |
| 3         | Task performance with remote supervision.             |
| 4         | Independent in task performance.                      |
| 5         | Independent and supervising others.                   |
